# Supplementary material for: mTORC1 Signaling is a Critical Regulator of Postnatal Tendon Development
Source: PubMed Central journal article supplement (PMC5719403; doi:10.1038/s41598-017-17384-0), 2017-12-07
Supplement: 41598_2017_17384_MOESM1_ESM.pdf [file 41598_2017_17384_MOESM1_ESM.pdf]

## **mTORC1 Signaling is a Critical Regulator of Postnatal Tendon Development**

Joohyun Lim<sup>1</sup>, Elda Munivez<sup>1</sup>, Ming-Ming Jiang<sup>1</sup>, I-Wen Song<sup>1</sup>, Francis Gannon<sup>2</sup>, Douglas R. Keene<sup>3</sup>, Ronen Schweitzer<sup>3</sup>, Brendan H. Lee<sup>1\*</sup>, Kyu Sang Joeng<sup>1</sup>

<sup>1</sup>Department of Molecular and Human Genetics, Baylor College of Medicine, One Baylor Plaza, Houston, TX 77030, USA.

<sup>2</sup>Department of Pathology, Baylor College of Medicine, One Baylor Plaza, Houston, TX 77030, USA.

<sup>3</sup>Research Center, Shriners Hospital for Children, Portland, OR 97239, USA.

## Supplementary Figures

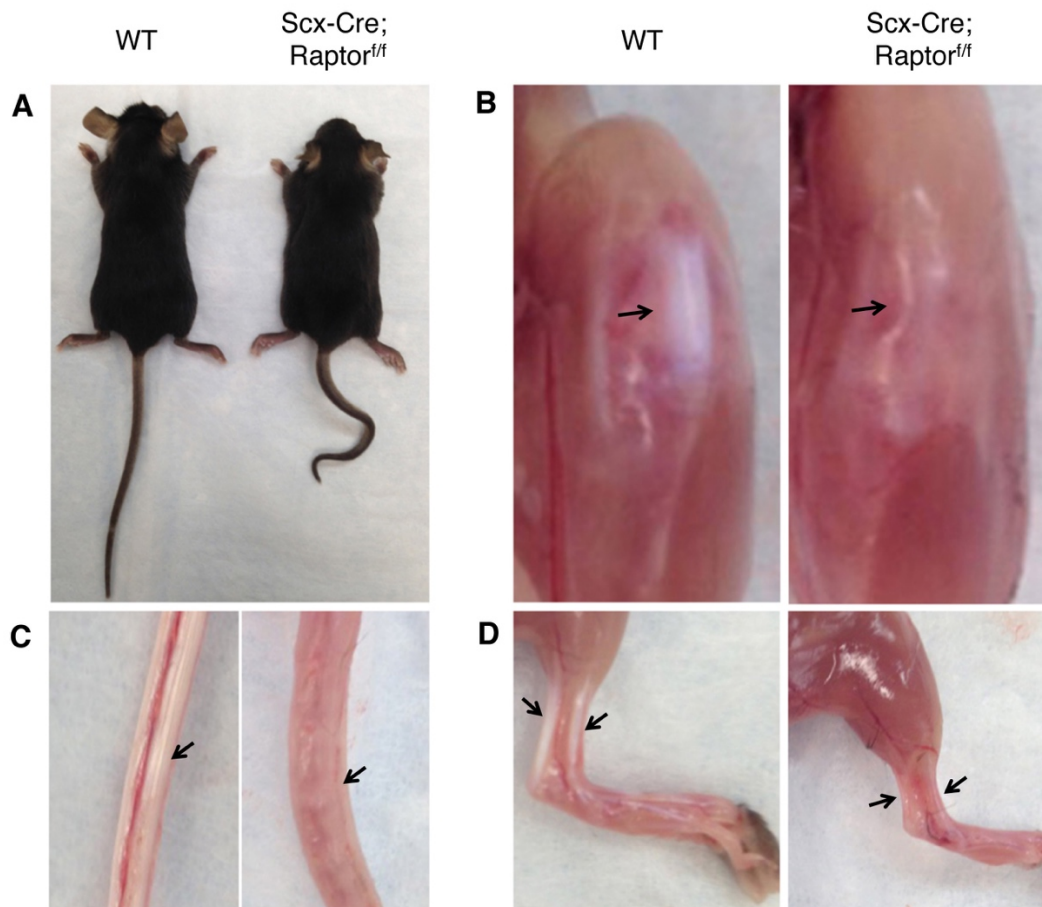

**Figure S1. Loss of mTORC1 in tendons caused curly tails and translucent tendons.**

(A) The straight tail of wildtype mice and the curly tail of *Scx-Cre; Raptor<sup>ff</sup>* littermates at 1 month of age. (B-D) Visual examination of patellar (B), tail (C), and Achilles tendon (D) showed white color in wildtype and translucent color in *Scx-Cre; Raptor<sup>ff</sup>* littermates. Arrows indicate tendons.

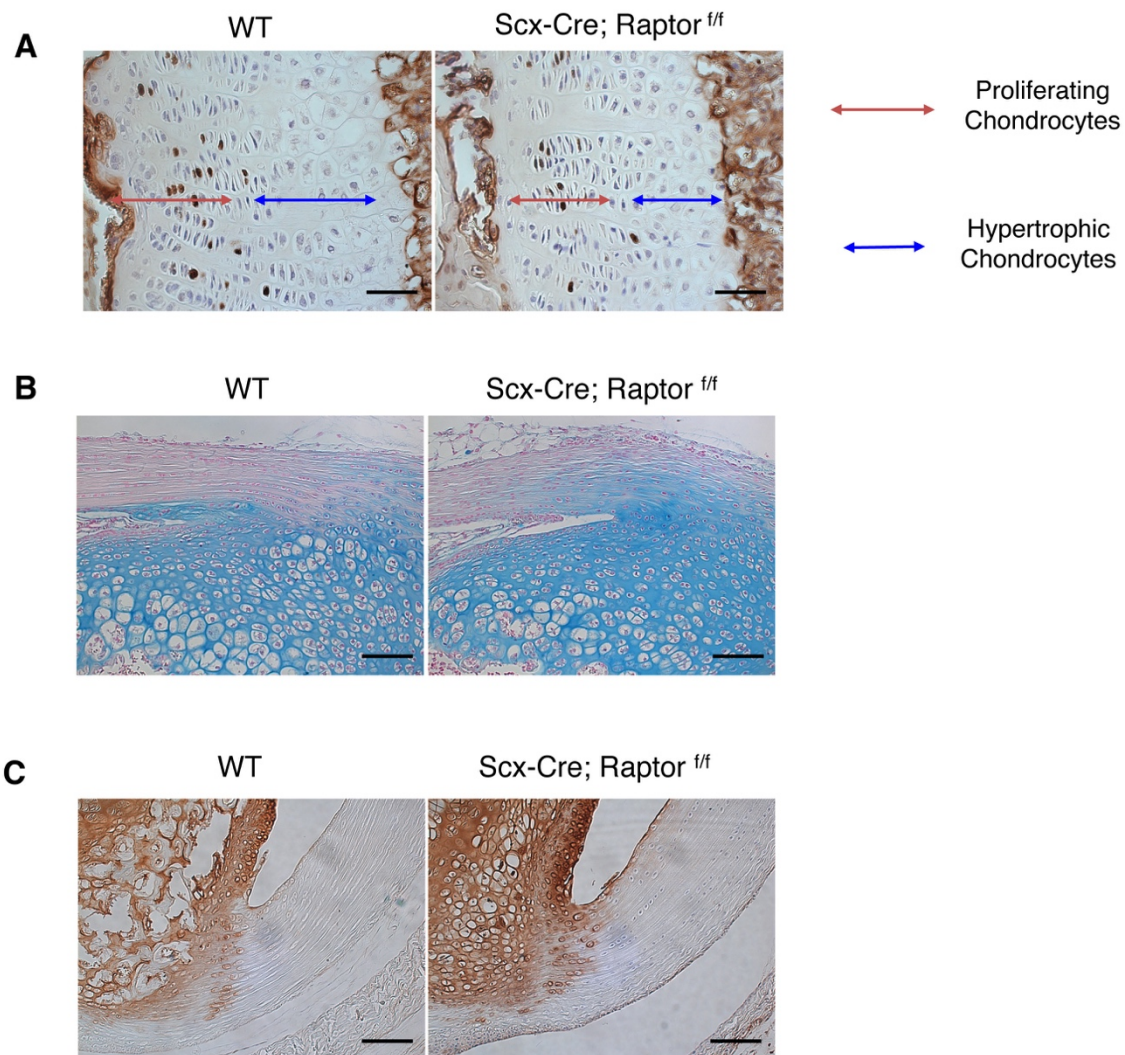

**Figure S2.** (A) BrdU staining (BrdU) of the tibia growth plate from wildtype and *Scx-Cre; Raptor<sup>ff</sup>* littermates at postnatal day 30 (P30). (B) Alcian blue staining of the entheses of patellar tendon (integration site of patellar to tibia) from wildtype and *Scx-Cre; Raptor<sup>ff</sup>* littermates at P30. (C) Col2a1 immunohistochemistry of the entheses of patellar tendon from wildtype and *Scx-Cre; Raptor<sup>ff</sup>* littermates at P30. Scale bars indicate 100 μm.

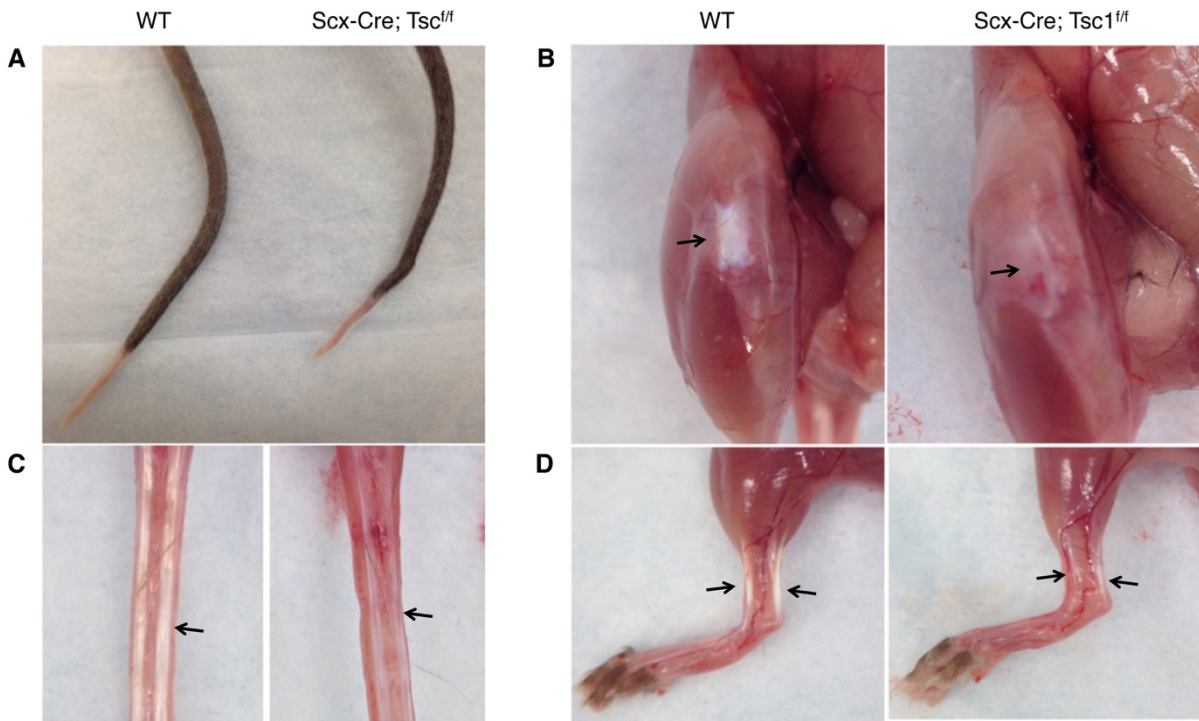

**Figure S3. Gain of mTORC1 in tendon caused kinked tails and pale-white tendons.**

(A) The straight tail of wildtype mice and kinks at the distal end of the tail of *Scx-Cre; Tsc1<sup>ff</sup>* littermates at 1 month of age. (B-D) Visual examination of patellar (B), tail (C), and Achilles tendons (D) in wildtype and *Scx-Cre; Tsc1<sup>ff</sup>* littermates. Arrows indicate tendons.

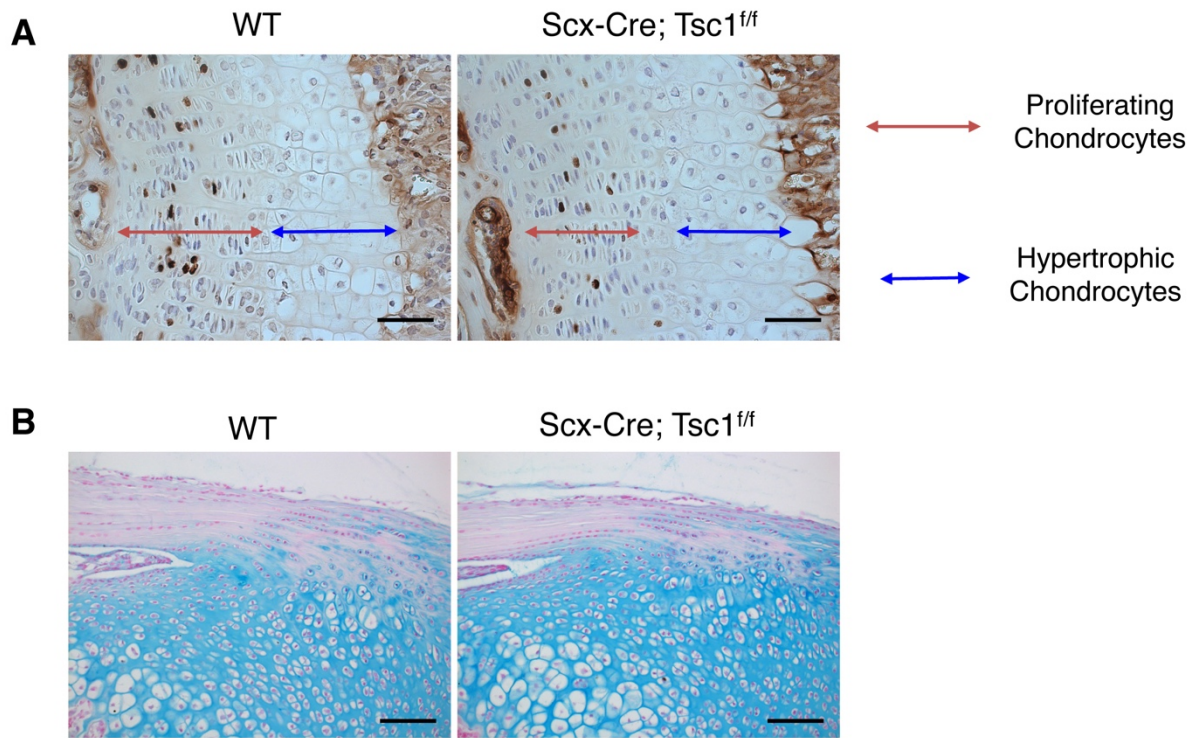

**Figure S4.** (A) BrdU staining (BrdU) of the tibia growth plate from wildtype and *Scx-Cre; Tsc1<sup>ff</sup>* littermates at P30. (B) Alcian blue staining of the enthesis of patellar tendon from wildtype and *Scx-Cre; Tsc1<sup>ff</sup>* littermates at P30. Scale bars indicate 100 $\mu$ m.

**A**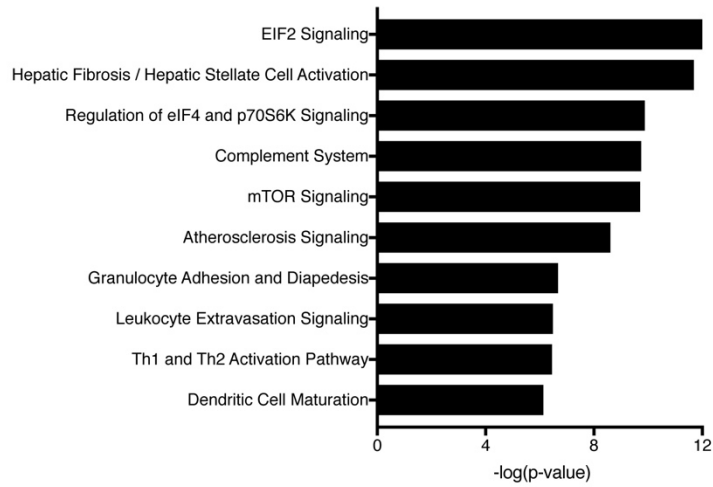**B**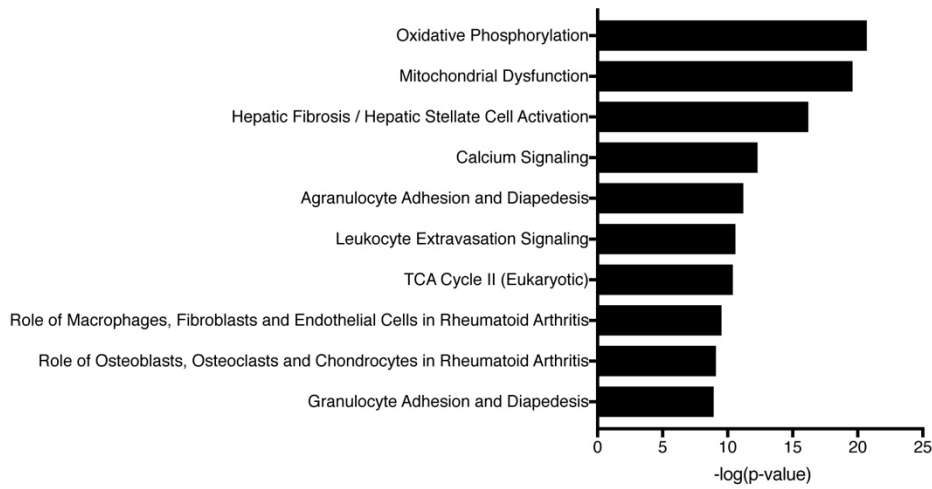

**Figure S5.** Ingenuity system (IPA) core analysis revealed differential effects of loss- or gain-of mTORC1 signaling. Results of top 10 affected canonical pathways in (A) *Scx-Cre; Raptor<sup>ff</sup>* and (B) *Scx-Cre; Tsc1<sup>ff</sup>* mice. X-axis:  $-\log(P\text{-value})$ . Y-axis: pathways identified by IPA.
